# Supplementary material for: Anti-Cancer Effects of Oxygen-Atom-Modified Derivatives of Wasabi Components on Human Leukemia Cells
Source: MDPI journal article supplement (doi:10.3390/ijms24076823), 2023-04-06
Supplement: s1 [file s1]

S1:

A. p-Histone H3

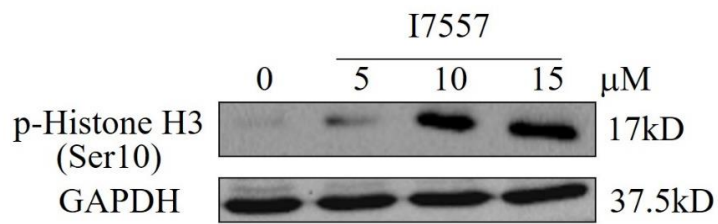

B. p-Chk-1

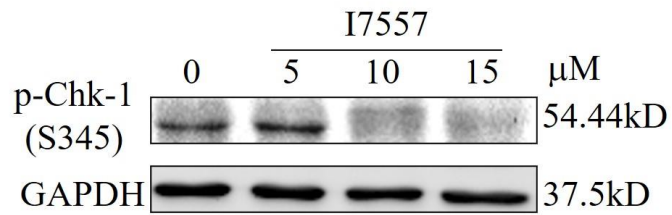

C. p-Chk-2

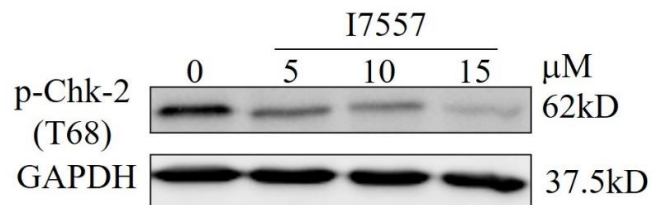

D. p-Cdc25c

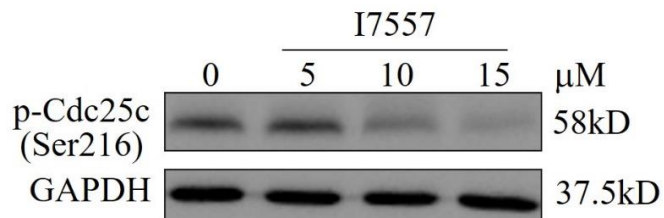

E. p-Cdc2

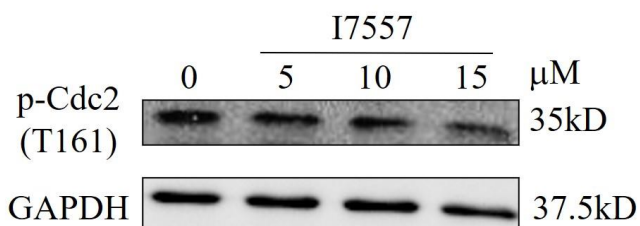

F. Cyclin-B1

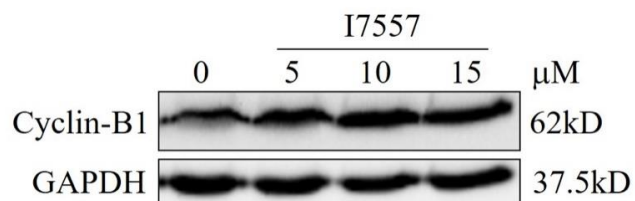

### G. p-Plk-1

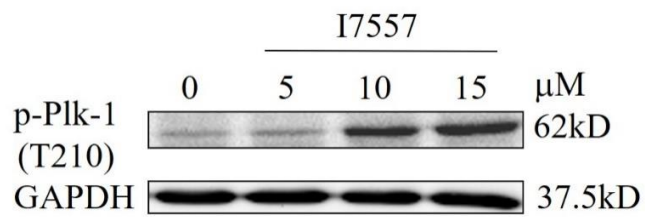

### Supplementary Figure S1:

The expression of cell cycle related proteins in K562 cells. Cells were treated by I7557 (0 – 15 μM) for 48 hours.

### S2:

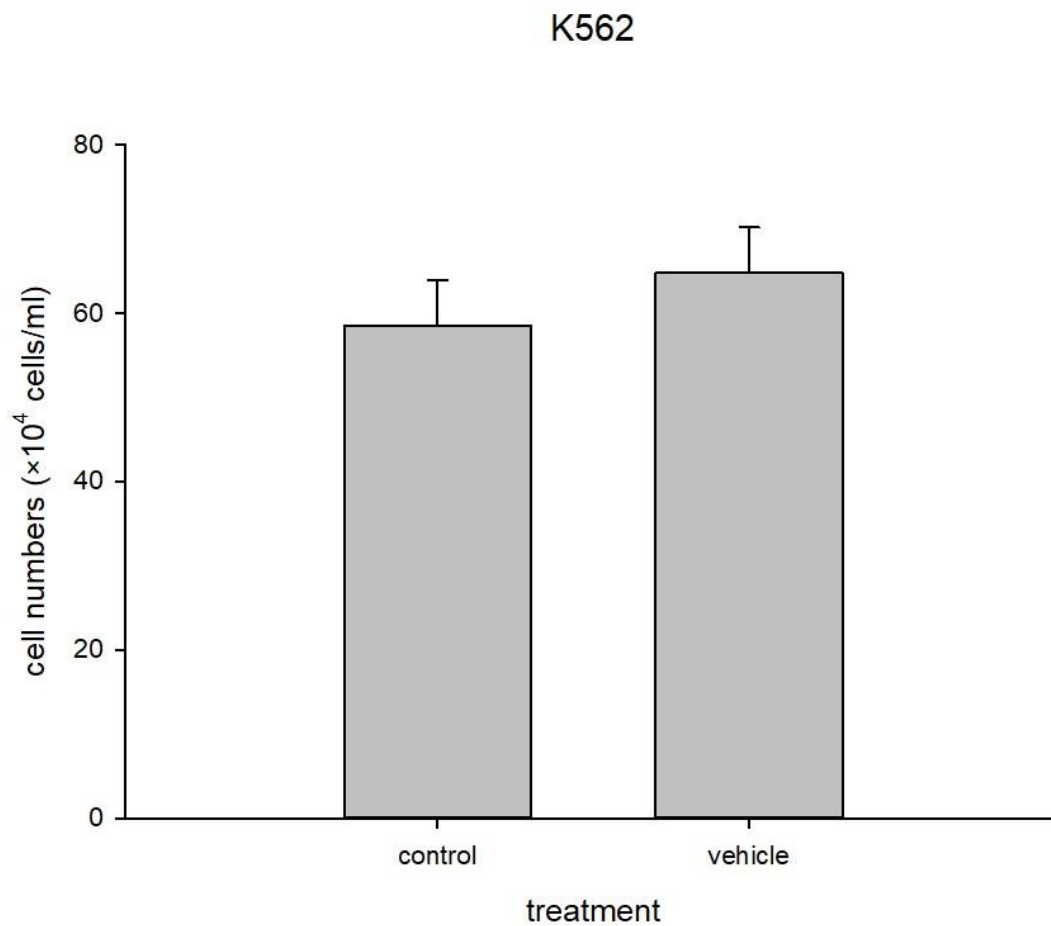

### Supplementary Figure S2:

There is no significant difference of cell viability with comparison of control group and vehicle group (DMSO).
